# Supplementary material for: Rational design of a structure-switching DNA aptamer for potassium ions
Source: PubMed Central journal article supplement — FEBS Open Bio. 2014 Sep 16;4:788–95. doi: 10.1016/j.fob.2014.08.008 (PMC4209343; doi:10.1016/j.fob.2014.08.008), 2014-09-16

# TBA Data

240 nm Data Fit

| y = m4+(1/(1+(m0/m1)^m2))*(m... |           |           |
|---------------------------------|-----------|-----------|
|                                 | Value     | Error     |
| m1                              | 1.7209e-5 | 2.1542e-6 |
| m2                              | 1.1365    | 0.20904   |
| m3                              | -4.6472   | 0.25578   |
| m4                              | 5.3583    | 0.41191   |
| Chisq                           | 6.4847    | NA        |
| R                               | 0.99229   | NA        |

295 nm Data Fit

| y = m4+(1/(1+(m0/m1)^m2))*(m... |           |           |
|---------------------------------|-----------|-----------|
|                                 | Value     | Error     |
| m1                              | 1.3259e-5 | 2.0073e-7 |
| m2                              | 1.1922    | 0.024962  |
| m3                              | 8.781     | 0.078463  |
| m4                              | 34.455    | 0.09345   |
| Chisq                           | 0.55772   | NA        |
| R                               | 0.9999    | NA        |

| y = m4+(1/(1+(m0/m1)^m2))*(m... |           |           |
|---------------------------------|-----------|-----------|
|                                 | Value     | Error     |
| m1                              | 9.5165e-6 | 3.3556e-6 |
| m2                              | 1.1995    | 0.47506   |
| m3                              | -1.7197   | 0.5355    |
| m4                              | -9.6393   | 0.43844   |
| Chisq                           | 19.694    | NA        |
| R                               | 0.96627   | NA        |

270 nm Data Fit

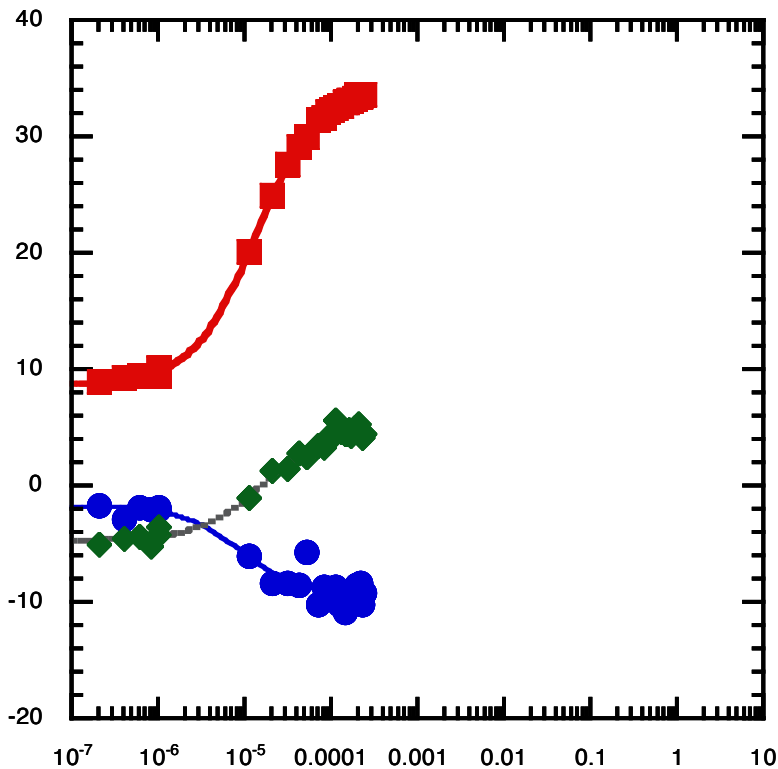

Supplement: mmc1.pdf [file mmc1.pdf]
