# Supplementary material for: Rational design of a structure-switching DNA aptamer for potassium ions
Source: PubMed Central journal article supplement — FEBS Open Bio. 2014 Sep 16;4:788–95. doi: 10.1016/j.fob.2014.08.008 (PMC4209343; doi:10.1016/j.fob.2014.08.008), 2014-09-16

# 18113 Data

240 nm Data Fit

| y = m4+(1/(1+(m0/m1)^m2))*(m... |           |            |
|---------------------------------|-----------|------------|
|                                 | Value     | Error      |
| m1                              | 0.0075883 | 0.00092265 |
| m2                              | 1.0355    | 0.12181    |
| m3                              | -2.9156   | 0.30484    |
| m4                              | 10.756    | 0.64576    |
| Chisq                           | 2.6367    | NA         |
| R                               | 0.9947    | NA         |

295 nm Data Fit

| y = m4+(1/(1+(m0/m1)^m2))*(m... |           |            |
|---------------------------------|-----------|------------|
|                                 | Value     | Error      |
| m1                              | 0.0065916 | 0.00023778 |
| m2                              | 1.2539    | 0.052866   |
| m3                              | 1.5052    | 0.19187    |
| m4                              | 25.065    | 0.35889    |
| Chisq                           | 1.1953    | NA         |
| R                               | 0.9993    | NA         |

| y = m4+(1/(1+(m0/m1)^m2))*(m... |           |            |
|---------------------------------|-----------|------------|
|                                 | Value     | Error      |
| m1                              | 0.0078905 | 0.00093375 |
| m2                              | 1.3082    | 0.18917    |
| m3                              | 2.0663    | 0.29802    |
| m4                              | -9.1233   | 0.59048    |
| Chisq                           | 3.1115    | NA         |
| R                               | 0.99177   | NA         |

270 nm Data Fit

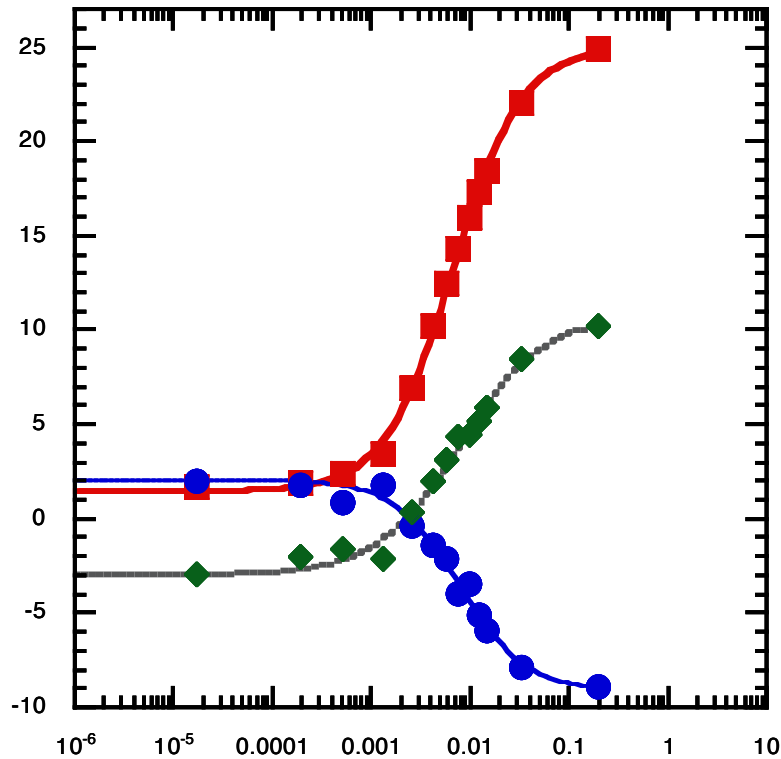

Supplement: mmc2.pdf [file mmc2.pdf]
