# Supplementary material for: Rational design of a structure-switching DNA aptamer for potassium ions
Source: PubMed Central journal article supplement — FEBS Open Bio. 2014 Sep 16;4:788–95. doi: 10.1016/j.fob.2014.08.008 (PMC4209343; doi:10.1016/j.fob.2014.08.008), 2014-09-16

# 19114 Data

240 nm Data Fit

| y = m4+(1/(1+(m0/m1)^m2))*(m... |          |           |
|---------------------------------|----------|-----------|
|                                 | Value    | Error     |
| m1                              | 0.020056 | 0.0017404 |
| m2                              | 0.98618  | 0.074033  |
| m3                              | -2.9865  | 0.19347   |
| m4                              | 7.7716   | 0.25912   |
| Chisq                           | 0.75809  | NA        |
| R                               | 0.99804  | NA        |

295 nm Data Fit

| y = m4+(1/(1+(m0/m1)^m2))*(m... |          |            |
|---------------------------------|----------|------------|
|                                 | Value    | Error      |
| m1                              | 0.013677 | 0.00076415 |
| m2                              | 0.98942  | 0.047309   |
| m3                              | 1.3269   | 0.21398    |
| m4                              | 19.329   | 0.24634    |
| Chisq                           | 0.86225  | NA         |
| R                               | 0.99923  | NA         |

| y = m4+(1/(1+(m0/m1)^m2))*(m... |          |           |
|---------------------------------|----------|-----------|
|                                 | Value    | Error     |
| m1                              | 0.020271 | 0.0025308 |
| m2                              | 1.0579   | 0.12202   |
| m3                              | 1.7475   | 0.23895   |
| m4                              | -7.0134  | 0.30899   |
| Chisq                           | 1.2193   | NA        |
| R                               | 0.99549  | NA        |

270 nm Data Fit

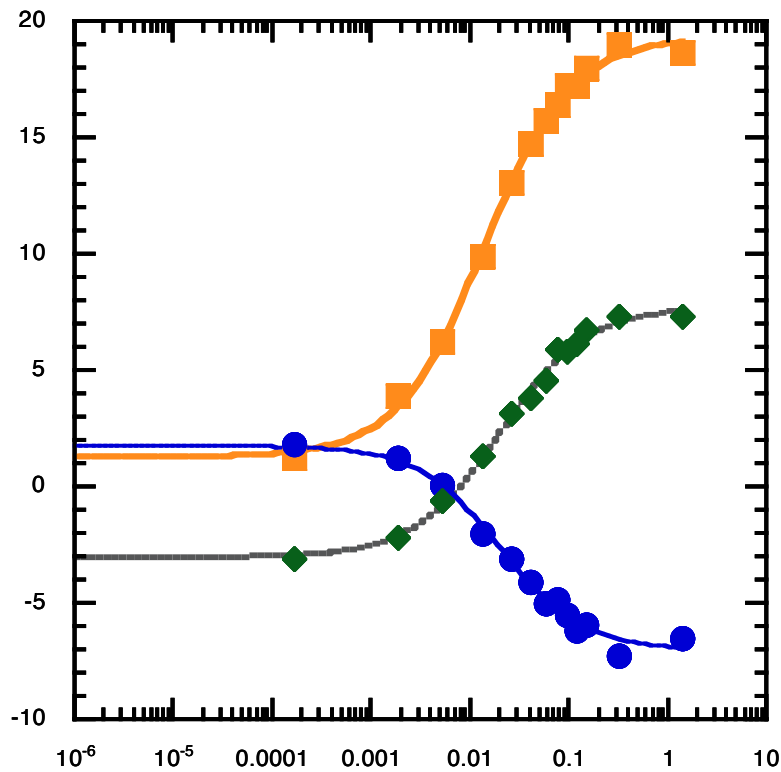

Supplement: mmc3.pdf [file mmc3.pdf]
