# Supplementary material for: Rational design of a structure-switching DNA aptamer for potassium ions
Source: PubMed Central journal article supplement — FEBS Open Bio. 2014 Sep 16;4:788–95. doi: 10.1016/j.fob.2014.08.008 (PMC4209343; doi:10.1016/j.fob.2014.08.008), 2014-09-16

# 20105 Data

240 nm Data Fit

$$y = m4 + (1 / (1 + (m0/m1)^{m2})) * (m3 - m4)$$

|       | Value   | Error     |
|-------|---------|-----------|
| m1    | 34569   | 5.0611e+6 |
| m2    | 0.49926 | 0.15282   |
| m3    | -3.1241 | 0.21647   |
| m4    | 1326    | 94559     |
| Chisq | 1.7689  | NA        |
| R     | 0.99306 | NA        |

295 nm Data Fit

$$y = m4 + (1 / (1 + (m0/m1)^{m2})) * (m3 - m4)$$

|       | Value     | Error     |
|-------|-----------|-----------|
| m1    | 1.0295e+5 | 5.3711e+6 |
| m2    | 0.39393   | 0.064038  |
| m3    | 2.0441    | 0.14167   |
| m4    | 820.64    | 16065     |
| Chisq | 0.57794   | NA        |
| R     | 0.99826   | NA        |

$$y = m4 + (1 / (1 + (m0/m1)^{m2})) * (m3 - m4)$$

|       | Value   | Error   |
|-------|---------|---------|
| m1    | 11.407  | 59.667  |
| m2    | 0.52147 | 0.18976 |
| m3    | 4.7118  | 0.23733 |
| m4    | -23.211 | 49.549  |
| Chisq | 2.1411  | NA      |
| R     | 0.98795 | NA      |

270 nm Data Fit

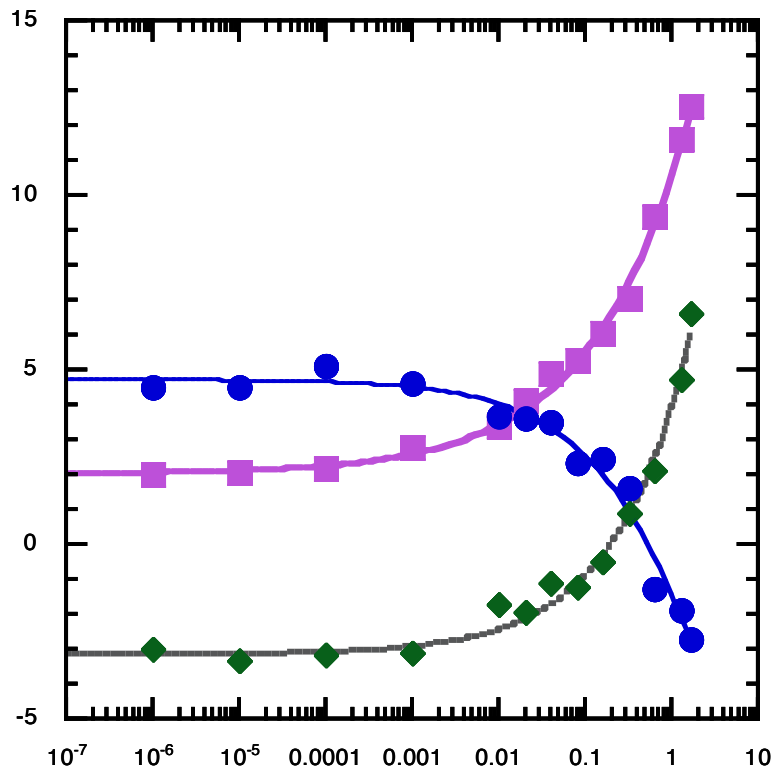

Supplement: mmc4.pdf [file mmc4.pdf]
